# Supplementary material
Source: PubMed Central journal article supplement (PMC8153408)
Supplement: NIHMS1669512-supplement-Online_materials.pdf [file NIHMS1669512-supplement-Online_materials.pdf]

1 **Supplemental material:**

2

3 **Lateral size of graphene oxide determines differential cellular**  
4 **uptake and cell death pathways in Kupffer cells, LSECs, and**  
5 **hepatocytes**

6

7 *Jiulong Li<sup>a,b</sup>, Xiang Wang<sup>a,b</sup>, Kuo-Ching Mei<sup>a,b</sup>, Chong Hyun Chang<sup>a,b</sup>, Jinhong Jiang<sup>a,b</sup>,*  
8 *Xiangsheng Liu<sup>a,b</sup>, Qi Liu<sup>a,b</sup>, Linda M. Guiney<sup>c</sup>, Mark C. Hersam<sup>c</sup>, Yu-Pei Liao<sup>a,b</sup>, Huan*  
9 *Meng<sup>a,b,d</sup>, Tian Xia<sup>a,b,d,\*</sup>*

10 <sup>a</sup> Center of Environmental Implications of Nanotechnology (UC CEIN), University of  
11 California, Los Angeles, CA 90095, USA

12 <sup>b</sup> California NanoSystems Institute, University of California, Los Angeles, CA 90095, USA

13 <sup>d</sup> Division of NanoMedicine, Department of Medicine, University of California, Los Angeles,  
14 CA 90095, USA

15 <sup>c</sup> Departments of Materials Science and Engineering, Chemistry, and Medicine, Northwestern  
16 University, Evanston, IL 60208, USA

17

18 \*Corresponding Author: Tian Xia, M.D./Ph.D.,

19 Department of Medicine, Division of NanoMedicine, UCLA School of Medicine, 52-175 CHS,  
20 10833 Le Conte Ave, Los Angeles, CA 90095-1680.

21 E-mail: txia@ucla.edu

| <b>Contents</b>                                                                                  | <b>Pages</b> |
|--------------------------------------------------------------------------------------------------|--------------|
| <b>Fig. S1.</b> The endotoxin level of GOs                                                       | S3           |
| <b>Fig. S2.</b> Cell morphological changes of KUP5, Hepa 1-6, and LSEC cells                     | S4           |
| <b>Fig. S3.</b> Visualizing the localization of GOs in LSECs by TEM                              | S5           |
| <b>Fig. S4.</b> Visualizing the localization of GOs in Hepa 1-6 cells by TEM                     | S6           |
| <b>Fig. S5.</b> Determination of intrinsic oxidative stress of GOs                               | S7           |
| <b>Fig. S6.</b> FITC-GOs incorporation in KUP5 cells pretreated various inhibitors               | S8           |
| <b>Fig. S7.</b> FITC-GOs incorporation in LSECs pretreated various inhibitors                    | S9           |
| <b>Fig. S8.</b> FITC-GOs incorporation in Hepa 1-6 cells pretreated various inhibitors           | S10          |
| <b>Fig. S9.</b> Lipid peroxidation production in KUP5 cells pretreated with WM                   | S11          |
| <b>Fig. S10.</b> Effect of various inhibitors on calcium flux in KUP5 cells                      | S12          |
| <b>Fig. S11.</b> Effect of various inhibitors on mtROS generation in KUP5 cells                  | S13          |
| <b>Fig. S12.</b> Effect of various inhibitors on caspase-1 activation in KUP5 cells              | S14          |
| <b>Fig. S13.</b> Effect of various inhibitors on pyroptosis in KUP5 cells                        | S15          |
| <b>Fig. S14.</b> Characterization for additional GO-1, GO-2, and GO-3 samples                    | S16          |
| <b>Fig. S15.</b> Cell viability of KUP5, LSEC, and Hepa 1-6 cells on GOs exposure                | S17          |
| <b>Fig. S16.</b> Cellular localization of GO-1, -2, and -3 in KUP5 cells                         | S18          |
| <b>Fig. S17.</b> Determine the phagocytosis of GO-1, -2, and -3 by KUP5 cells                    | S19          |
| <b>Fig. S18.</b> Lipid peroxidation production by GO-1, -2, and -3 in KUP5 cells                 | S20          |
| <b>Fig. S19.</b> MtROS generation and caspase-1 activation in KUP5 cells                         | S21          |
| <b>Fig. S20.</b> Effect of various inhibitors on cell swelling                                   | S22          |
| <b>Fig. S21.</b> Correlation plots of the GO in KUP5 cells                                       | S23          |
| <b>Fig. S22.</b> TNF- $\alpha$ production, IL-1 $\beta$ release, and cell swelling in KUP5 cells | S24          |
| <b>Tab. S1.</b> Hydrodynamic size, PDI, and zeta potential of GOs in different media             | S25          |

23

24

25

26 **Figures**

27

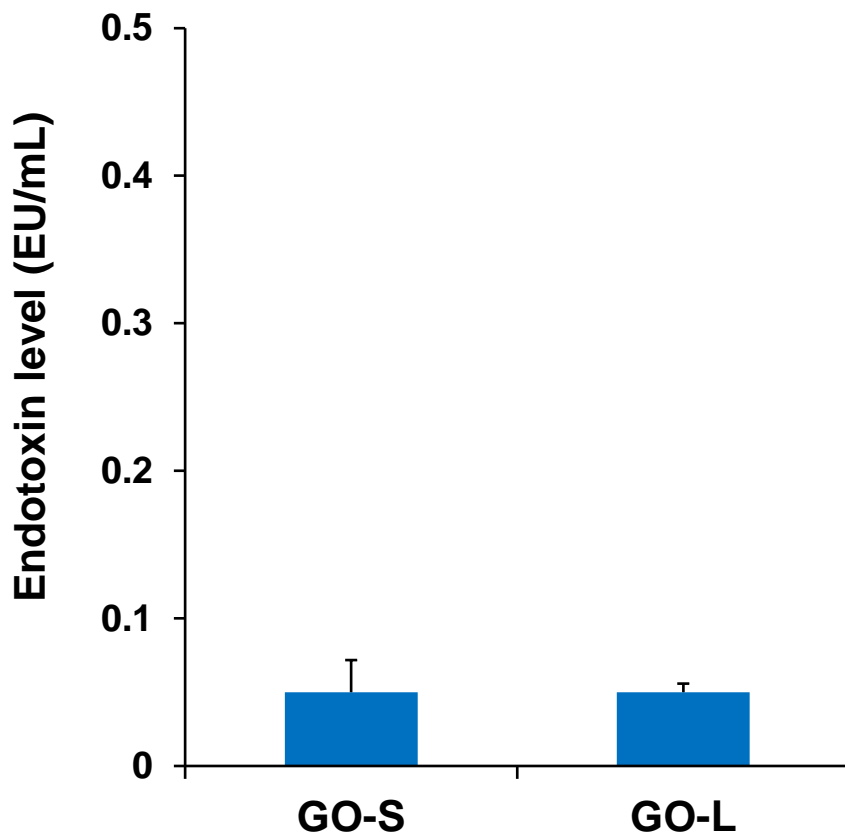

28

29 **Fig. S1.** The endotoxin level of GOs suspended at 50  $\mu\text{g}/\text{mL}$  in DI water was determined using  
30 a Limulus Amebocyte Lysate assay kit (Lonza, Walkersville, MD). The endotoxin limit (for  
31 medical devices) recommended by the FDA is 0.5 EU/mL.

32

33

34

35

36

37

38

39

40

41

42

43

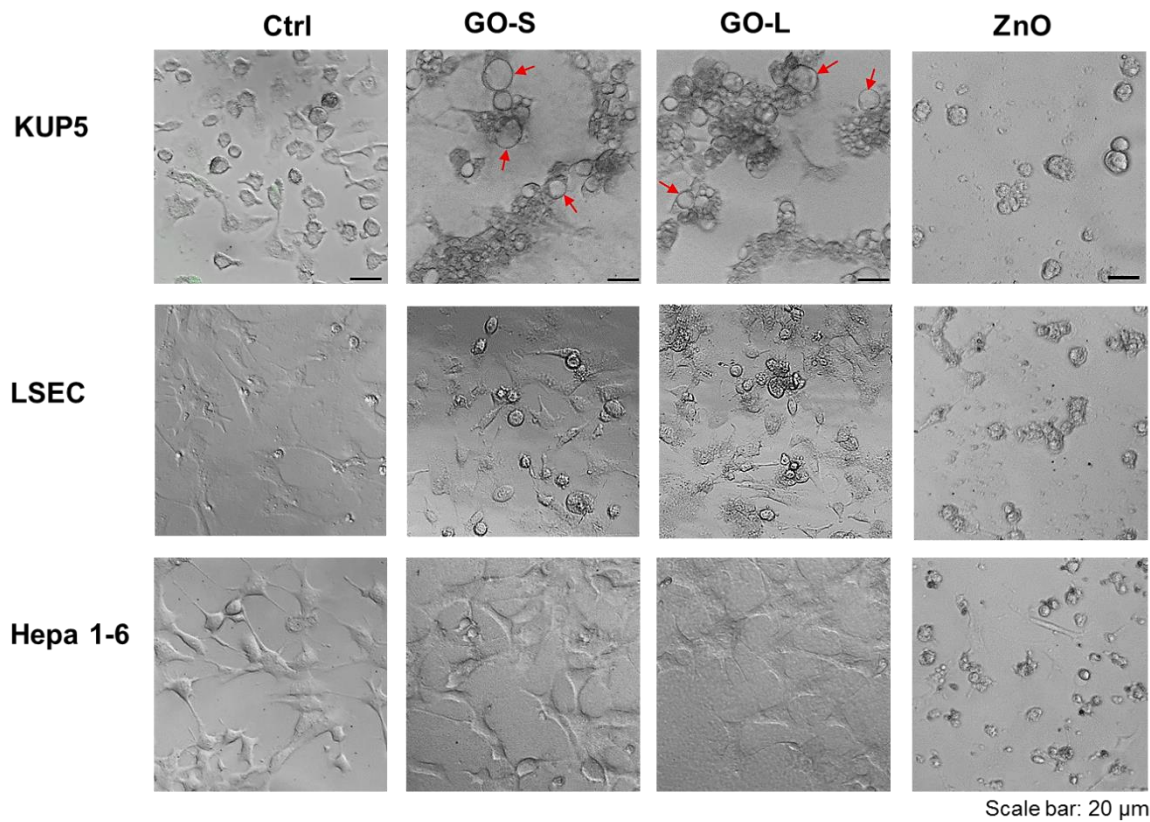

44

45 **Fig. S2.** Optical microscope images to compare the KUP5, LSEC, and Hepa 1-6 cell  
46 morphological changes by GO. The cells were exposed to 12.5  $\mu\text{g}/\text{mL}$  GO for 16 h at 37  $^{\circ}\text{C}$   
47 and 5%  $\text{CO}_2$  in a 12-well plate, respectively. The morphology of the cell was monitored using  
48 a Zeiss Optical Microscope (Carl Zeiss Microscopy LLC, White Plains, NY, USA). Red arrows  
49 indicate significant morphological changes by GO sheets in cells. The scale bar in the image is  
50 20  $\mu\text{m}$ .

51

52

53

54

55

56

57

58

59

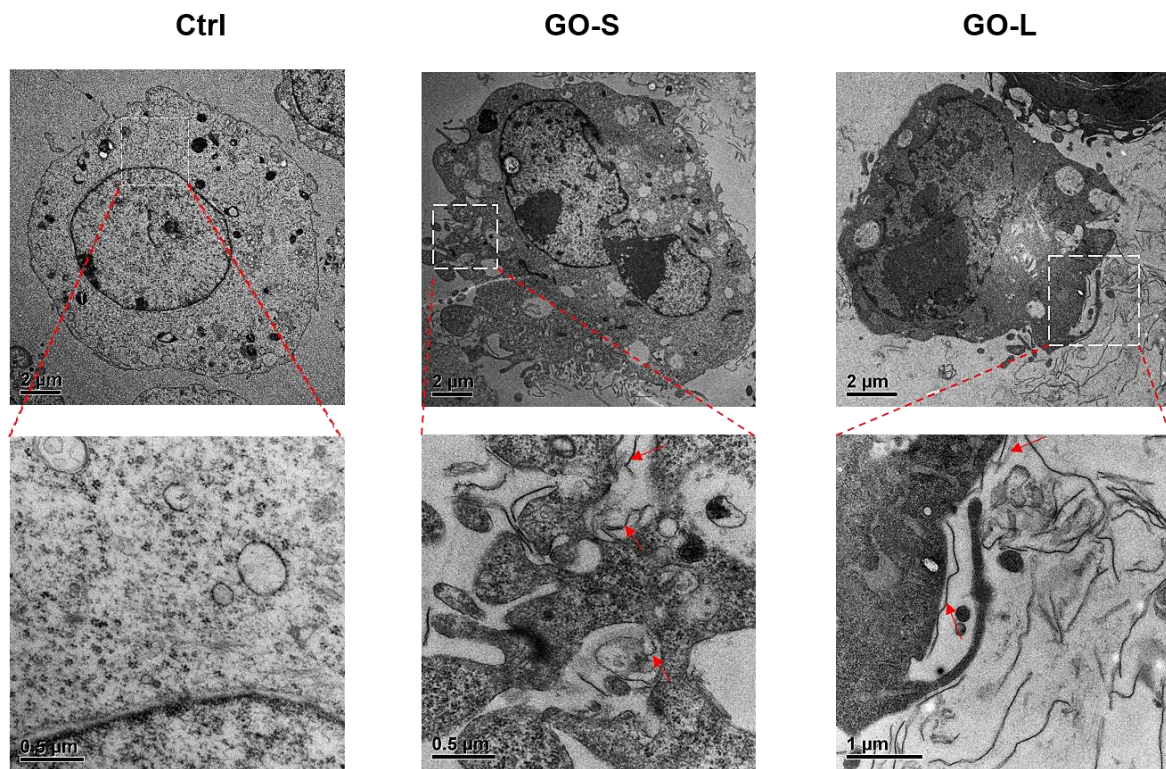

60

61 **Fig. S3.** Visualizing the interactions of GO with LSECs by TEM. After exposure to 50 μg/mL  
62 of GO for 16 h, the cells were washed, fixed, and stained for TEM viewing under a JEOL 1200-  
63 EX TEM with an accelerating voltage of 80K eV. Red arrows indicate GO sheets within the  
64 cytosol or on the plasma membrane. TEM images for untreated cells were also shown. Scale  
65 bar in the upper row is 2 μm; Scale bar in the lower row is 0.5 or 1 μm.

66

67

68

69

70

71

72

73

74



75

76

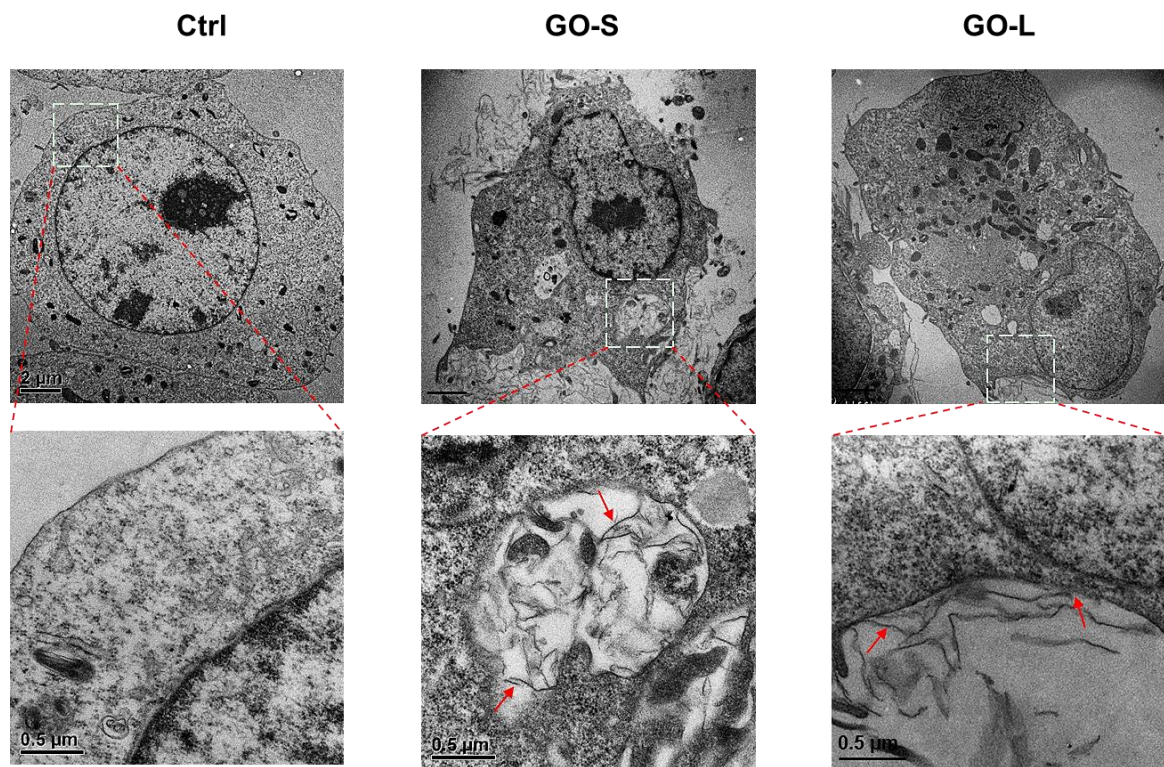

77

78 **Fig.S4.** Visualizing the localization of GO in Hepa 1-6 cells by TEM. After exposure to 50  
79 μg/mL of GO for 16 h, the cells were washed, fixed, and stained for TEM viewing. Red arrows  
80 indicate GO sheets within the cytosol or on the plasma membrane. TEM images for untreated  
81 cells were also shown. Scale bar in the upper row is 2 μm; Scale bar in the lower row is 0.5 μm.

82

83

84

85

86

87

88

89

90

91

92  
93

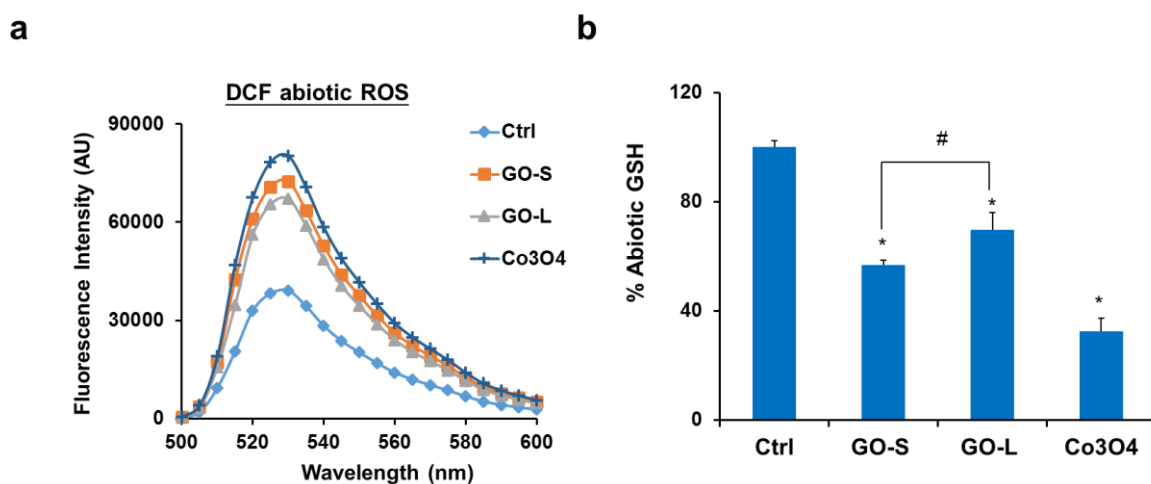

94  
95  
96  
97  
98  
99  
100  
101  
102  
103  
104  
105  
106  
107  
108  
109  
110  
111  
112

**Fig. S5.** Determination of intrinsic oxidative stress of GOs. (a) The abiotic ROS generation by 50  $\mu\text{g/mL}$  of GO was determined by  $\text{H}_2\text{DCFDA}$  fluorescence. DCF fluorescence emission spectra in the range of 500–600 nm were collected with an excitation wavelength of 490 nm. The treatment of  $\text{Co}_3\text{O}_4$  was set as a positive control. (b) Assessment of the abiotic GSH content was performed by adding 10  $\mu\text{L}$  of GOs at 50  $\mu\text{g/mL}$  to a 96-well plate together with 90  $\mu\text{L}$  of GSH-Glo agent for 30 min. The luminescence was detected by a SpectraMax M5e microplate reader. The treatment of  $\text{Co}_3\text{O}_4$  was set as a positive control. Asterisk (\*) means  $P < 0.05$ , compared to the control, and #,  $P < 0.05$ , indicates significance between GO-S and GO-L treatments.

113

114

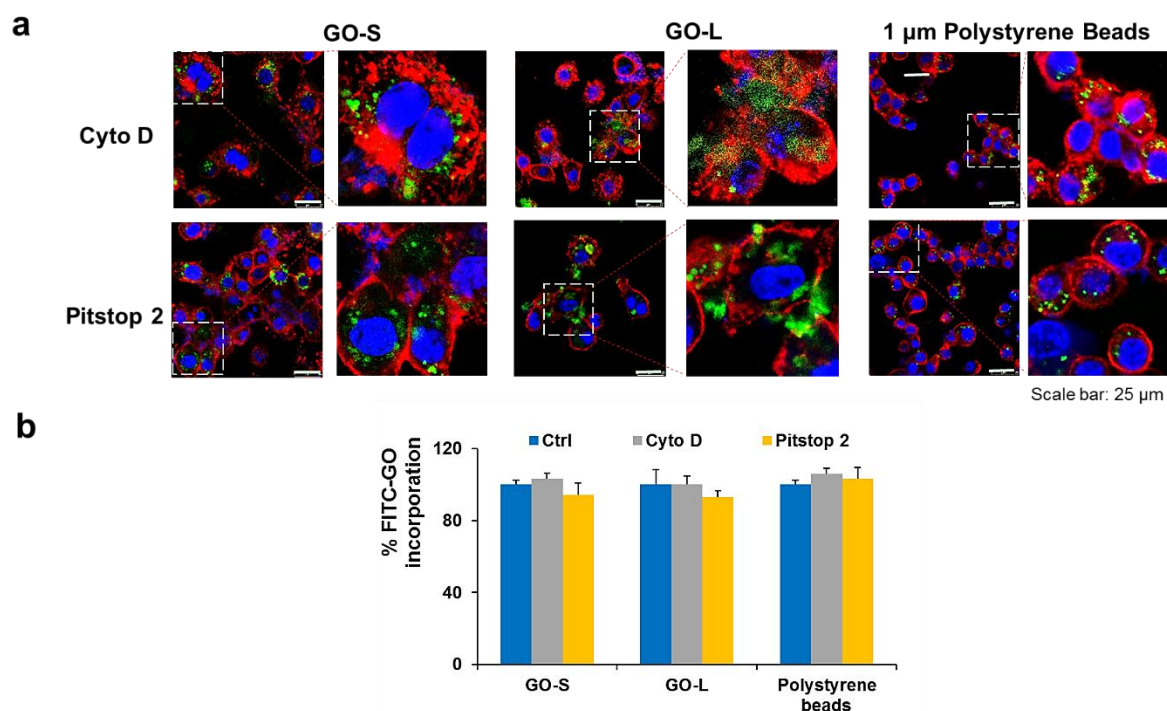

115

116 **Fig. S6.** Effects of cellular uptake inhibitor on FITC-GOs incorporation in KUP5 cells. (a)

117 Confocal images to determine the cellular localization of FITC-GO in KUP5 cells under the

118 cellular uptake inhibitor treatments. Before exposure to GO, KUP5 cells were treated with 5

119 μg/mL of cytochalasin D for 1 h and 20 μM of pitstop 2 for 0.5 h, respectively. After staining

120 with Hoechst 33342 dye and Alexa Fluor 594-labeled WGA antibody, the cells were visualized

121 under a Leica Confocal SP8-SMD confocal microscope. The scale bar in the left panel image

122 is 25 μm. (b) Quantification for the effects of cellular uptake inhibitor on FITC-GOs

123 incorporation in KUP5 cells by a fluorescence microplate reader.

124

125

126

127

128

129

130



131

132

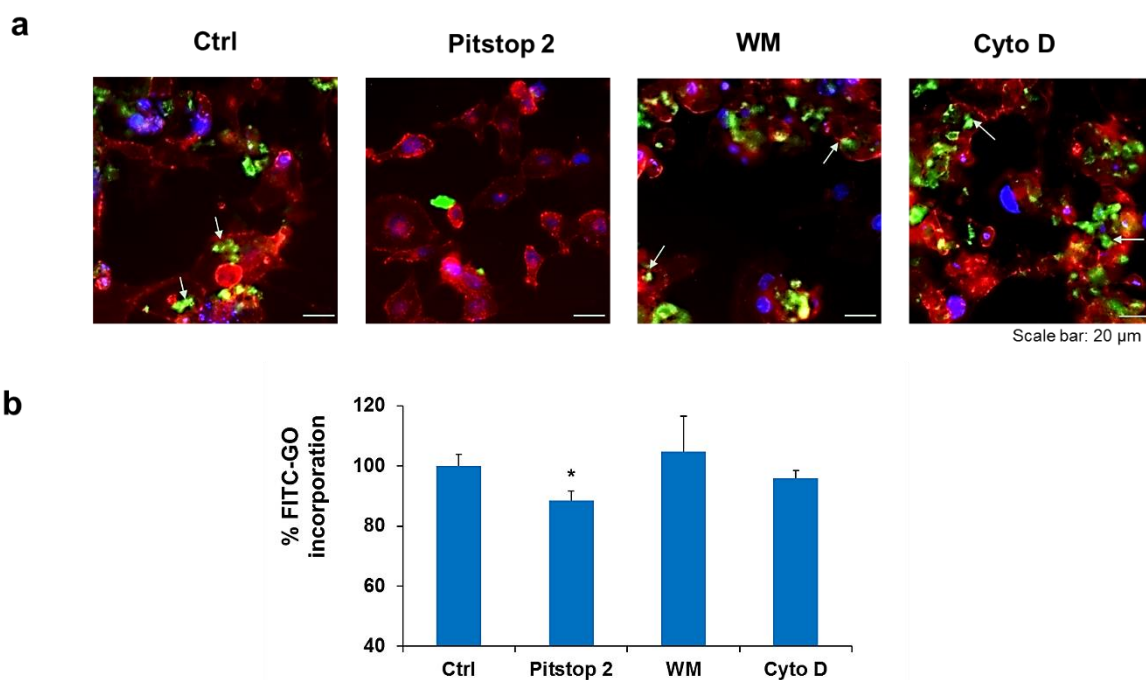

133

134 **Fig. S7.** Effects of cellular uptake inhibitor on FITC-GOs incorporation in LSECs. (a)

135 Representative fluorescence images to determine the cellular localization of FITC-GO in

136 LSECs under the cellular uptake inhibitor treatments. Before exposure to GO, cells were treated

137 with 20  $\mu$ M of pitstop 2 for 0.5 h, 1  $\mu$ M of wortmannin for 0.5 h, and 5  $\mu$ g/mL of cytochalasin

138 D for 1 h, respectively. White arrows indicated the uptake GO inside cells. The scale bar is 20

139  $\mu$ m. (b) Quantification for the effects of cellular uptake inhibitor on FITC-GOs incorporation

140 in LSECs by a microplate reader. \*,  $P < 0.05$ , indicates significance compared to the control.

141

142

143

144

145

146

147

148

149

150

151

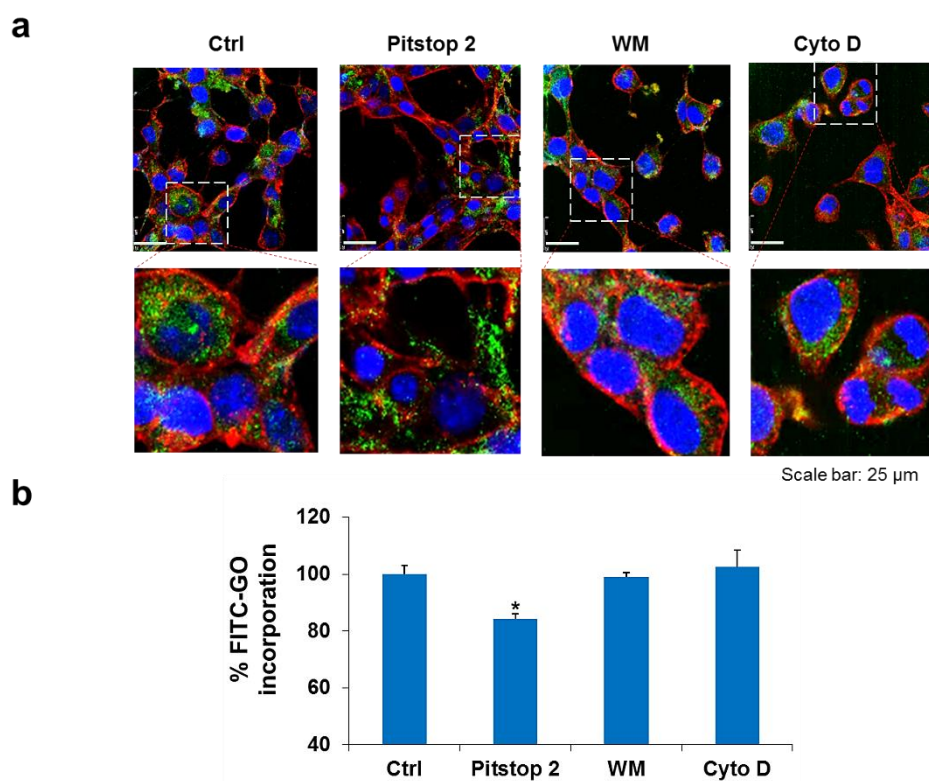

152

153 **Fig. S8.** Effects of cellular uptake inhibitor on FITC-GOs incorporation in Hepa 1-6 cells. (a)

154 Representative confocal images to determine the cellular localization of FITC-GO in Hepa 1-

155 6 cells under the cellular uptake inhibitor treatments. Before exposure to GO, Hepa 1-6 cells

156 were treated with 20  $\mu$ M of pitstop 2 for 0.5 h, 1  $\mu$ M of wortmannin for 0.5 h, and 5  $\mu$ g/mL of

157 cytochalasin D for 1 h, respectively. The scale bar in the left panel image is 25  $\mu$ m. (b)

158 Quantification for the effects of cellular uptake inhibitor on FITC-GOs incorporation in Hepa

159 1-6 cells by a microplate reader. \*,  $P < 0.05$ , indicates significance compared to the control.

160

161

162

163

164

165

166

167

168

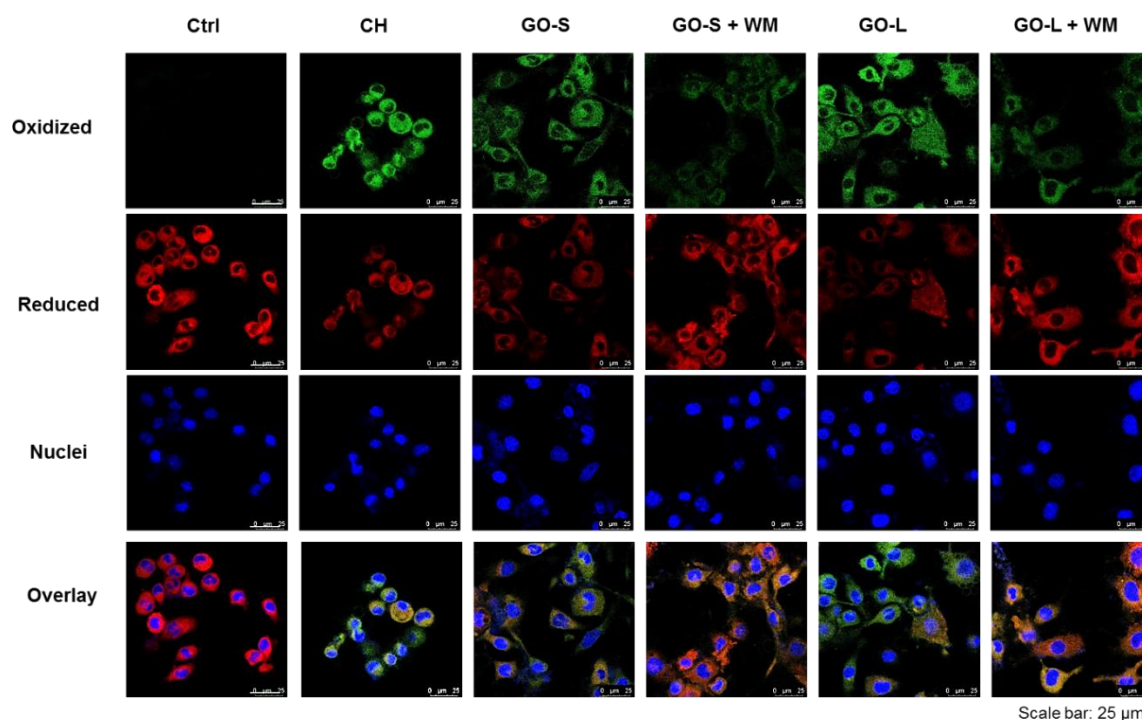

169

170 **Fig. S9.** Assessment of the plasma membrane lipid peroxidation production by GO in KUP5  
171 cells pretreated with WM. Confocal images to demonstrate the reduction of lipid peroxidation  
172 production in KUP5 cells. The images were acquired to visualize the reduced (red) and  
173 oxidized (green) fluorescent dye at excitation/emission wavelengths of 581/591 nm and  
174 488/510 nm. The scale bar is 25 μm.

175

176

177

178

179

180

181

182

183

184

185

186

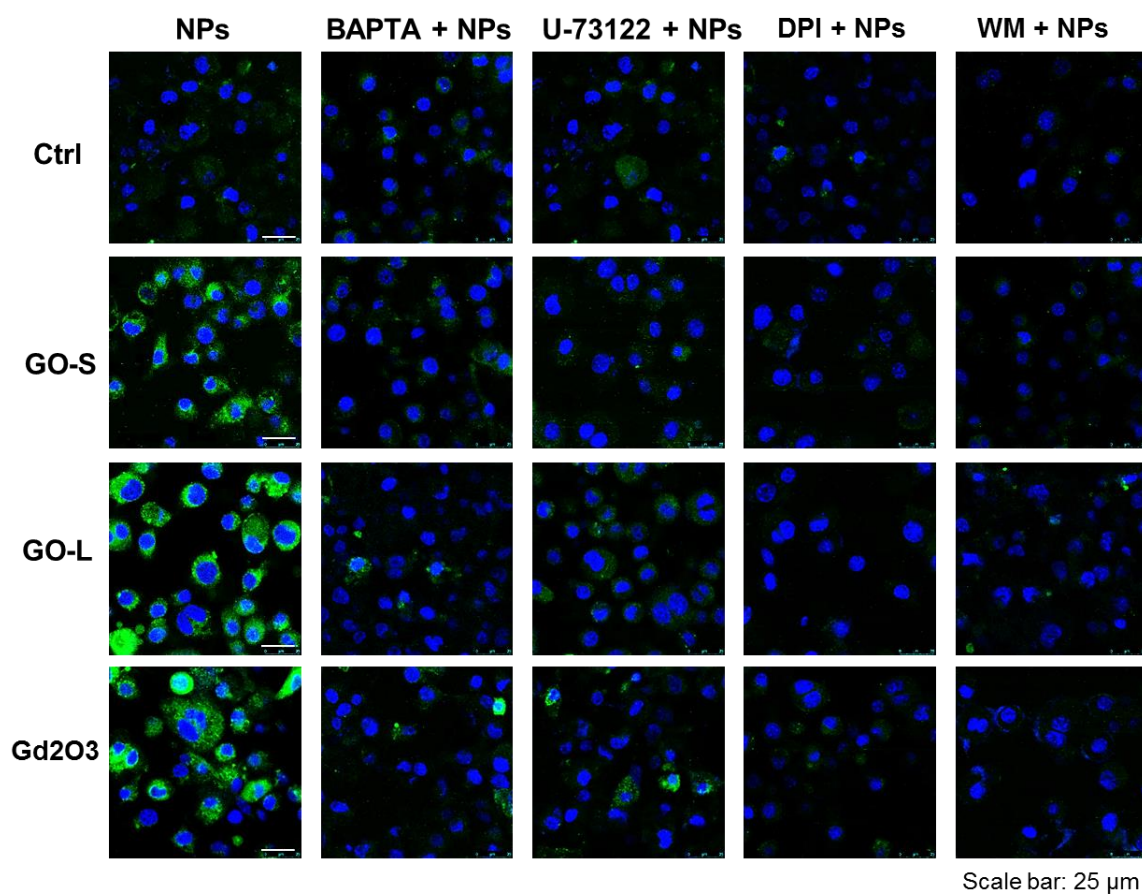

187

188 **Fig. S10.** Intercellular calcium accumulation assessed by confocal microscopy. KUP5 cells  
189 were pretreated with or without inhibitors (BAPTA as calcium chelator and U-73122 used as  
190 PLC inhibitor, DPI used as NADPH oxidase, WM used as phagocytosis inhibitor) before  
191 treatment of 12.5 μg/mL of GO or Gd<sub>2</sub>O<sub>3</sub> for 16 h. Cells were stained with 5 μM of Fluo-4 AM  
192 ester (green) for 60 min and Hoechst 33342 (blue) for 15 min. The scale bar is 25 μm.

193

194

195

196

197

198

199

200

201

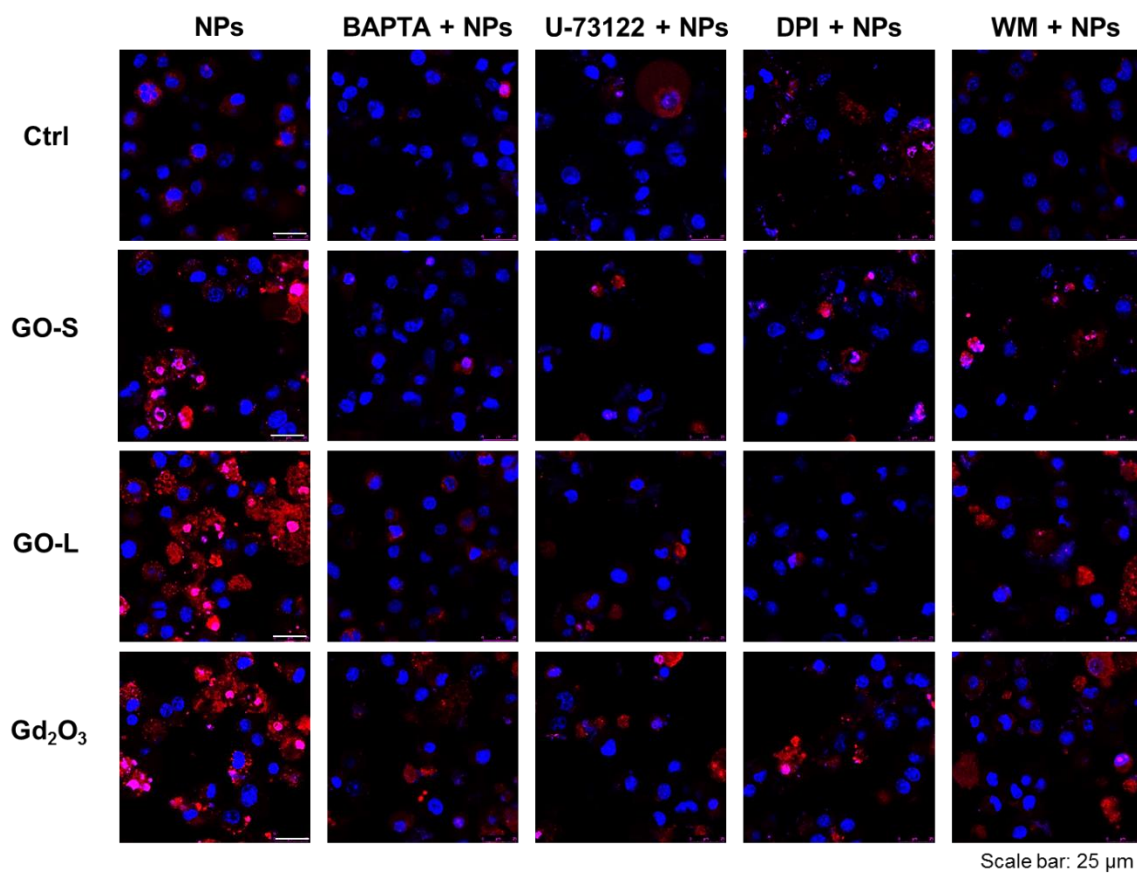

202

203 **Fig. S11.** Cellular mitochondrial ROS generation in KUP5 cells post-exposed to GO. KUP5  
204 cells were pretreated with or without inhibitors BAPTA, U-73122, DPI, and WM before  
205 exposure to 12.5  $\mu\text{g}/\text{mL}$  of GO or  $\text{Gd}_2\text{O}_3$  (positive control) for 16 h. Cells were stained with 5  
206  $\mu\text{M}$  of red MitoSOX and Hoechst 33342 for 15 min, respectively. The scale bar is 25  $\mu\text{m}$ .

207

208

209

210

211

212

213

214



215

216

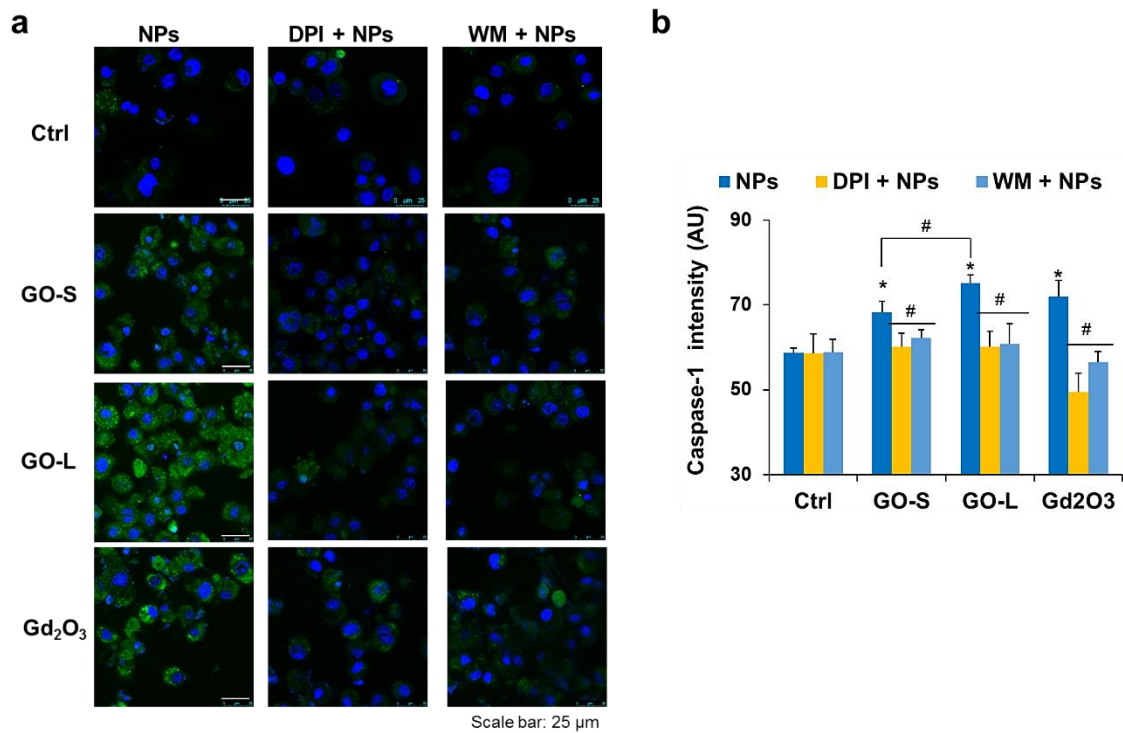

217

218 **Fig. S12.** Effect of various inhibitors on caspase-1 activation in GO-treated KUP5 cells. (a)  
219 The LPS-primed KUP5 cells were incubated with various inhibitors (DPI used as NADPH  
220 oxidase inhibitor and WM used as phagocytosis inhibitor) were exposed to 12.5 μg/mL GO or  
221 Gd<sub>2</sub>O<sub>3</sub> (positive control) for 16 h. Cells washed with PBS were stained with FAM-FLICA  
222 caspase substrate (green) for 1 h, stained with Hoechst 33342 for 15 min, and imaged using  
223 Leica Confocal SP8-SMD microscope. The scale bar is 25 μm. (b) Quantification for caspase  
224 1 activation in KUP5 cells under GO treatments with inhibitors. The fluorescence intensity was  
225 monitored at excitation/emission wavelengths of 492/520 nm. \*,  $P < 0.05$ , indicates  
226 significance compared with the control; #,  $P < 0.05$ , indicates significance compared to NP  
227 treatment alone.

228

229

230

231

232

233

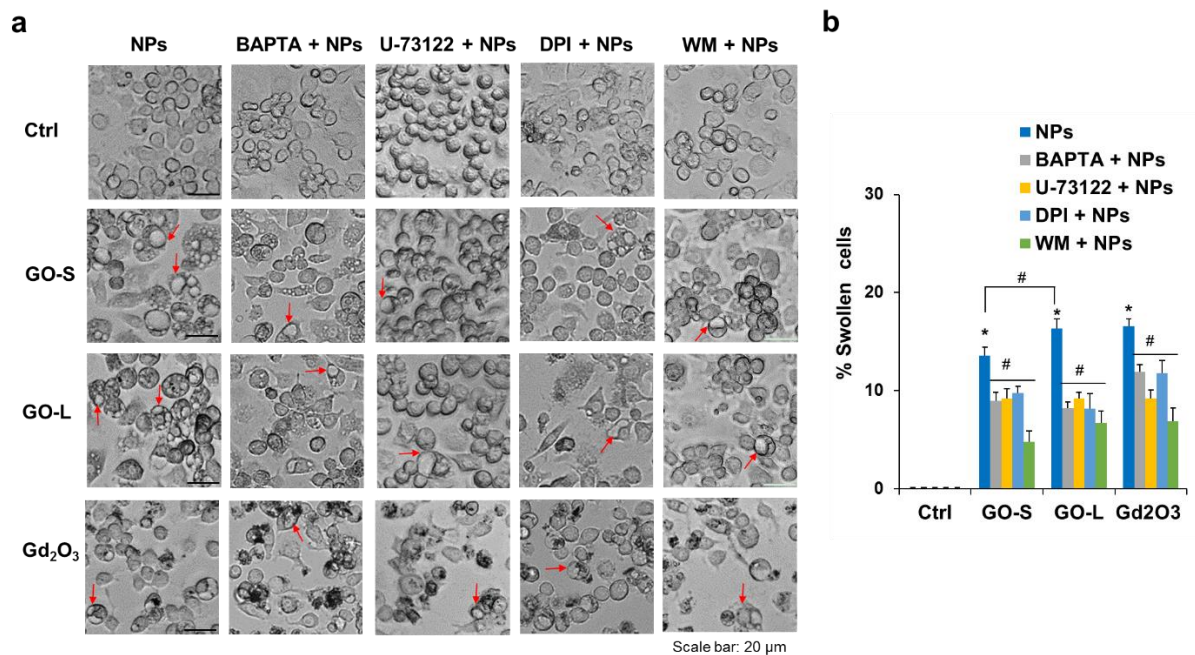

234

235 **Fig. S13.** Effect of various inhibitors on pyroptosis in KUP5 cells. (a) Optical microscope  
236 images to compare the GO-treated KUP5 cell morphological changes by various inhibitors  
237 (BAPTA used as calcium chelator, and U-73122 used as PLC inhibitor, DPI, and WM). Red  
238 arrows indicate the swollen cells. The scale bar is 20 μm. (b) The percentage of swollen cells  
239 was calculated based on the cells expressing at least two giant blebs in KUP5 cells treated with  
240 various inhibitors before 12.5 μg/mL of GO or Gd<sub>2</sub>O<sub>3</sub> exposure for 16 h. \*,  $P < 0.05$ , indicates  
241 significance compared with the control; #,  $P < 0.05$ , indicates significance compared to NP  
242 treatment alone.

243

244

245

246

247

248

249

250

251

252

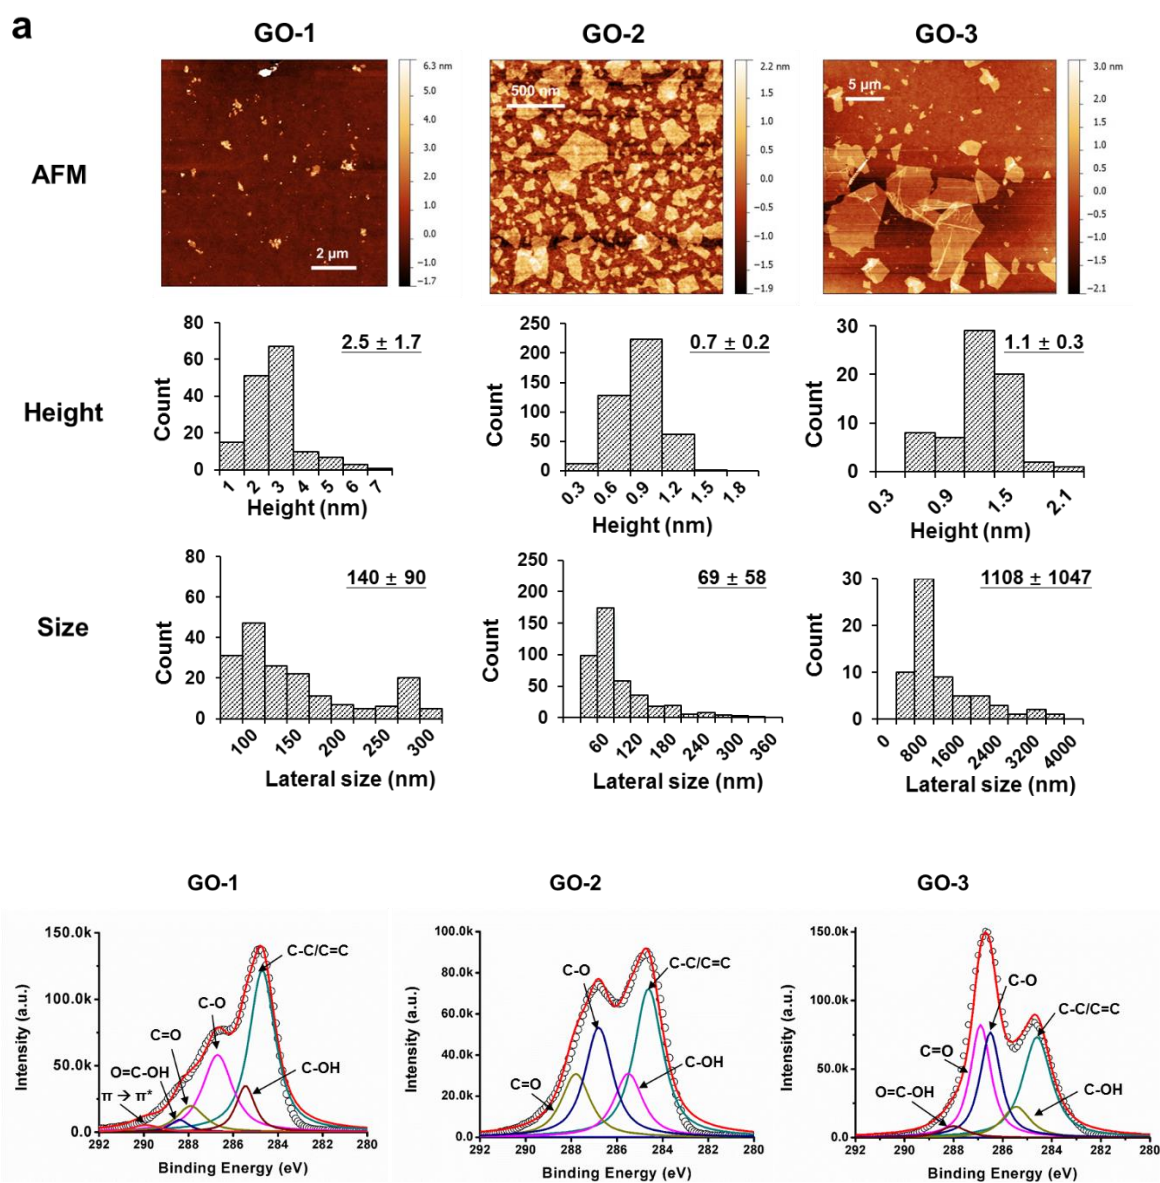

253

254

255 **Fig. S14.** Characterization for differential physicochemical properties among GO-1, GO-2, and  
 256 GO-3 samples. (a) Characterization of GO-1, GO-2, and GO-3 through AFM analysis. The  
 257 panels in the top row show the histograms of GO height distributions. The average height of  
 258 GO-1 is  $2.5 \pm 1.7$  nm, the average height of GO-2 is  $0.7 \pm 0.2$  nm, and the average height of  
 259 GO-3 is  $1.1 \pm 0.3$  nm. The panels in the bottom row show the histograms of GO lateral size  
 260 distributions. The average lateral size of GO-1, GO-2, and GO-3 is  $140 \pm 90$ ,  $69 \pm 58$ , and  $1108$   
 261  $\pm 1047$  nm, respectively. (b) C 1s XPS spectra of GO-1, GO-2, and GO-3.

262

263

264

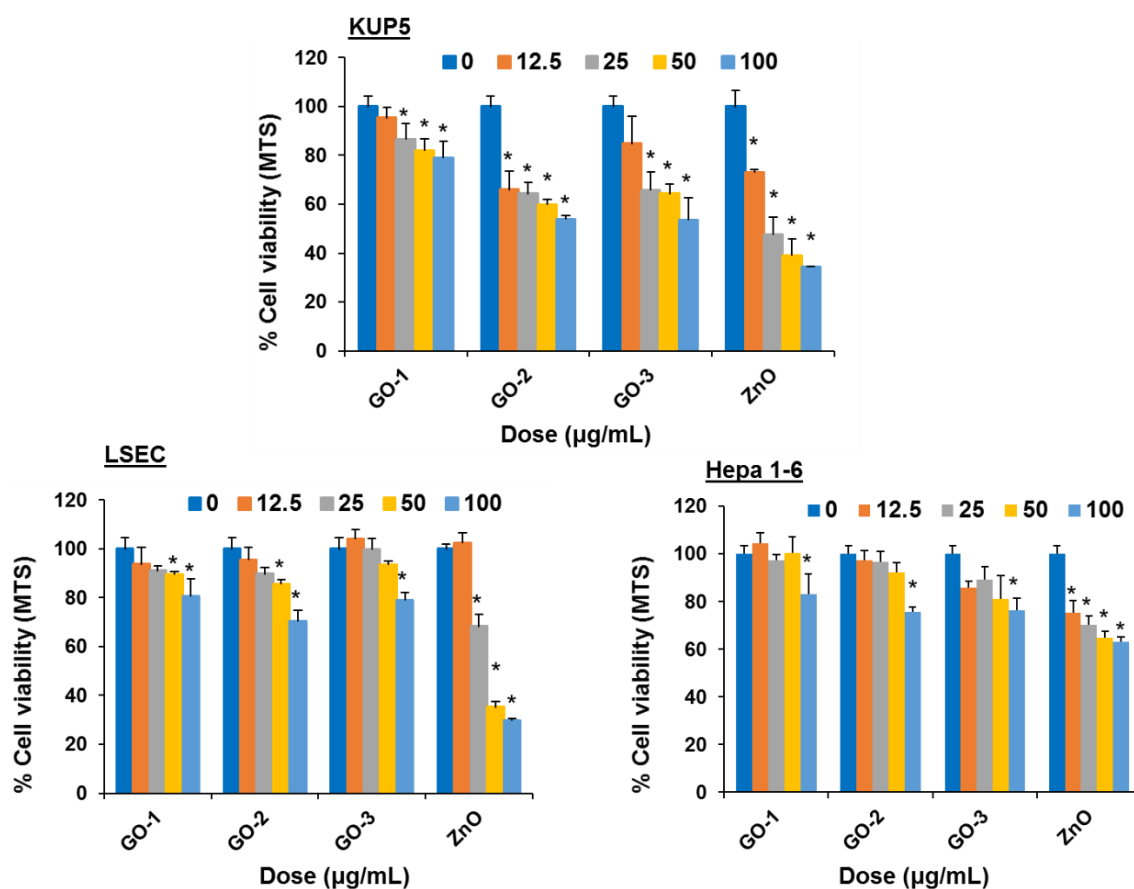

265

266 **Fig. S15.** Cell viability of KUP5, LSEC, and Hepa 1-6 cells on GOs exposure for 24 h at a dose  
267 range of 0–100  $\mu\text{g/mL}$  determined by MTS assay. The viability of untreated control cells was  
268 set to 100%. Asterisk (\*) means  $P < 0.05$ , compared to the control. KUP5 cells were more  
269 sensitive to the cytotoxic effects of GOs than LSECs and Hepa 1–6 cells.

270

271

272

273

274

275

276

277

278

279

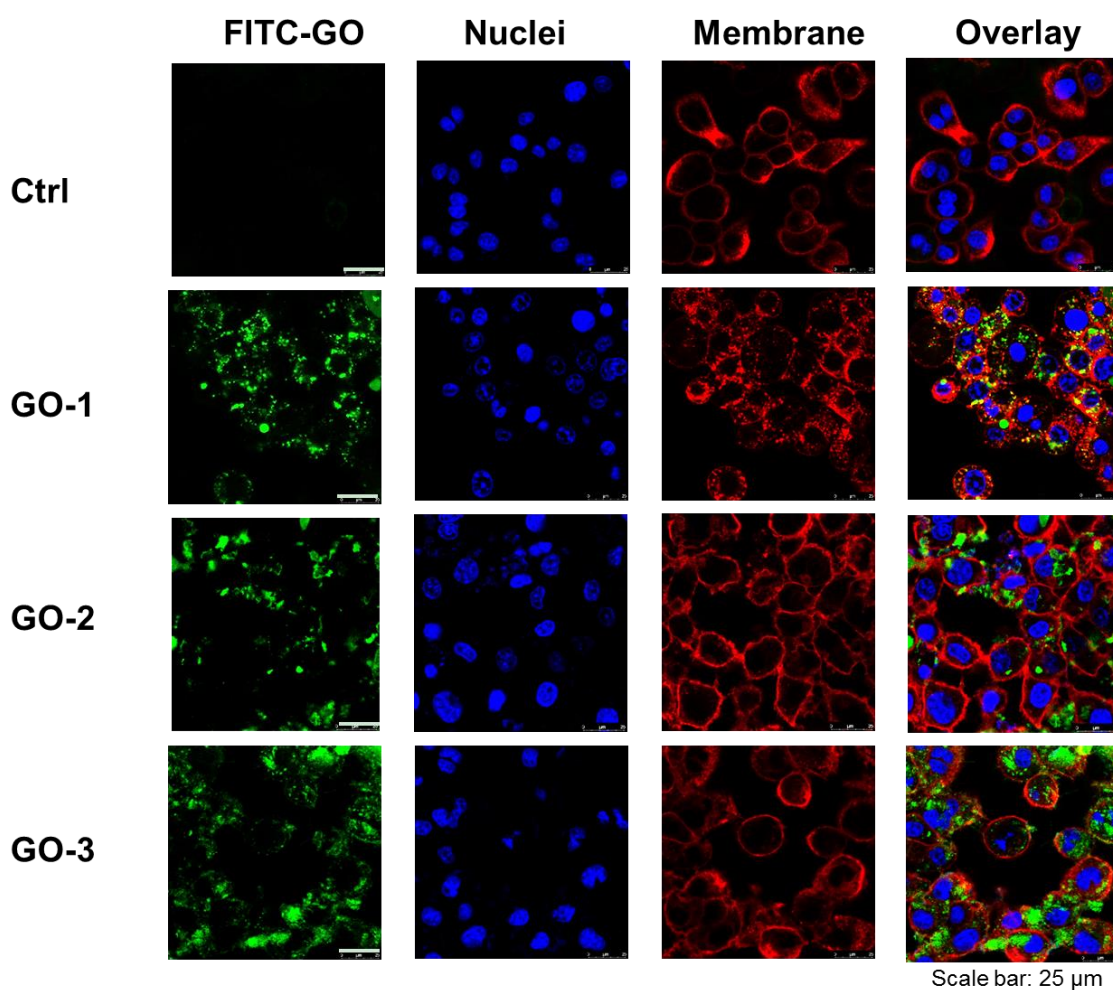

280

281 **Fig. S16.** Determination of cellular localization of GO-1, GO-2, and GO-3 in KUP5 cells using  
282 confocal imaging. KUP5 cells were incubated with 12.5  $\mu$ g/mL of FITC-labeled GOs (green)  
283 for 16 h, followed by staining with Hoechst 33342 dye (blue) and Alexa Fluor 594-labeled  
284 WGA antibody (red). The scale bar is 25  $\mu$ m.

285

286

287

288

289

290



291

292

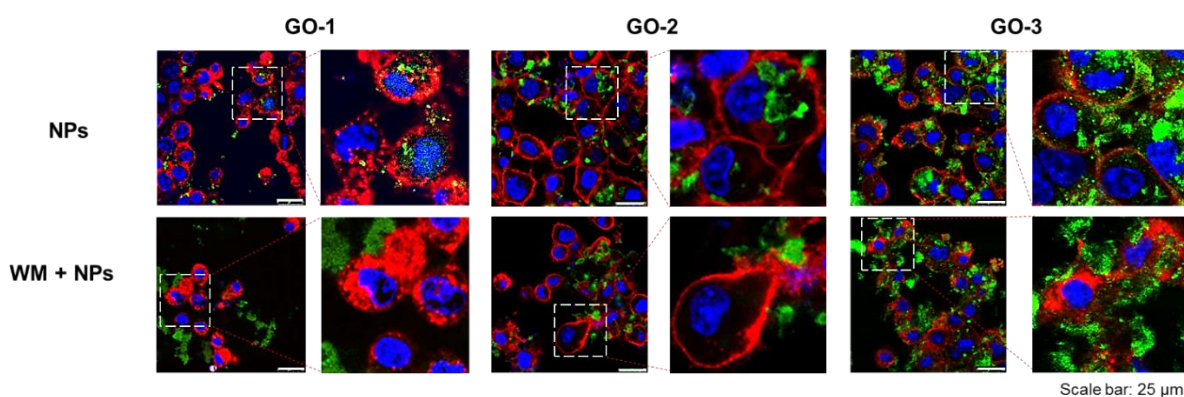

293

294 **Fig. S17.** Representative confocal images to determine the phagocytosis of GO-1, GO-2, and  
295 GO-3 by KUP5 cells. Before exposure to FITC-GOs, KUP5 cells were pretreated with 1  $\mu$ M  
296 WM for 0.5 h. After staining with Hoechst 33342 dye and Alexa Fluor 594-labeled WGA  
297 antibody, the cells were visualized under a confocal microscope. The scale bar in the left panel  
298 is 25  $\mu$ m.

299

300

301

302

303

304

305

306

307

308

309

310

311

312

313

314

315

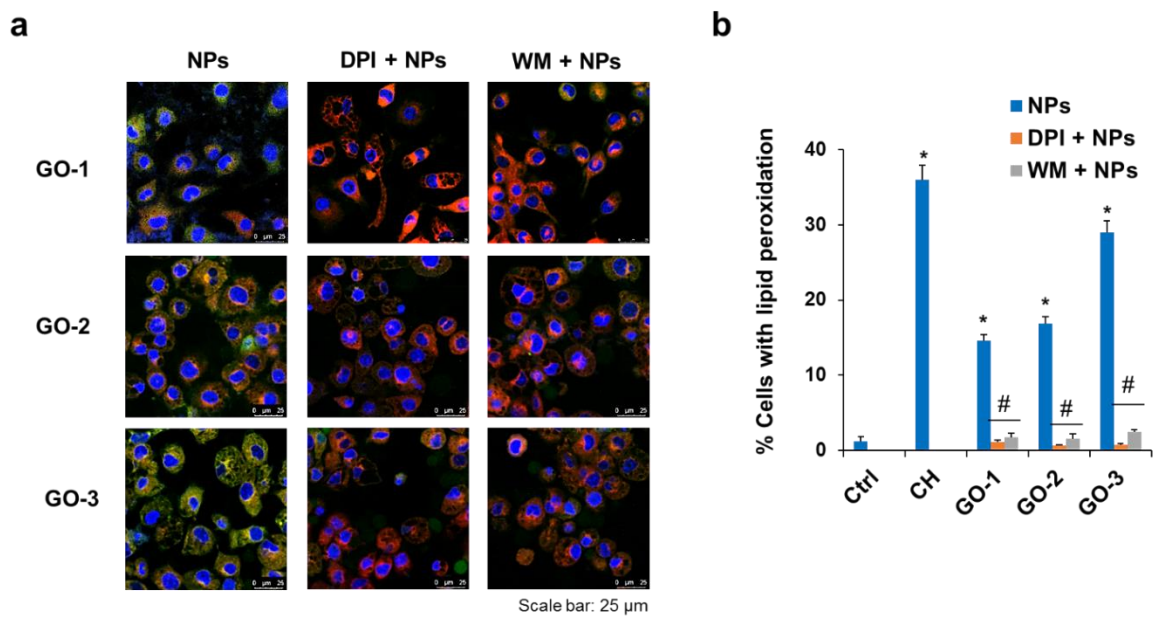

316

317 **Fig. S18.** Assessment of the plasma membrane lipid peroxidation production by GO-1, GO-2,  
318 and GO-3. (a) Confocal images to demonstrate the reduction of lipid peroxidation production  
319 in KUP5 cells pretreated with an NADPH oxidase inhibitor DPI and a phagocytosis inhibitor  
320 WM, respectively. The images were acquired to visualize the reduced (red) and oxidized (green)  
321 fluorescent dye at excitation/emission wavelengths of 581/591 nm and 488/510 nm. The scale  
322 bar is 25 μm. (b) Quantification for the percentage of cells with lipid peroxidation induced by  
323 GO-1, GO-2, and GO-3 by flow cytometry. \*,  $P < 0.05$ , indicates significance compared with  
324 the control; #,  $P < 0.05$ , indicates significance compared to GO treatment alone.

325

326

327

328

329

330

331

332

333

334

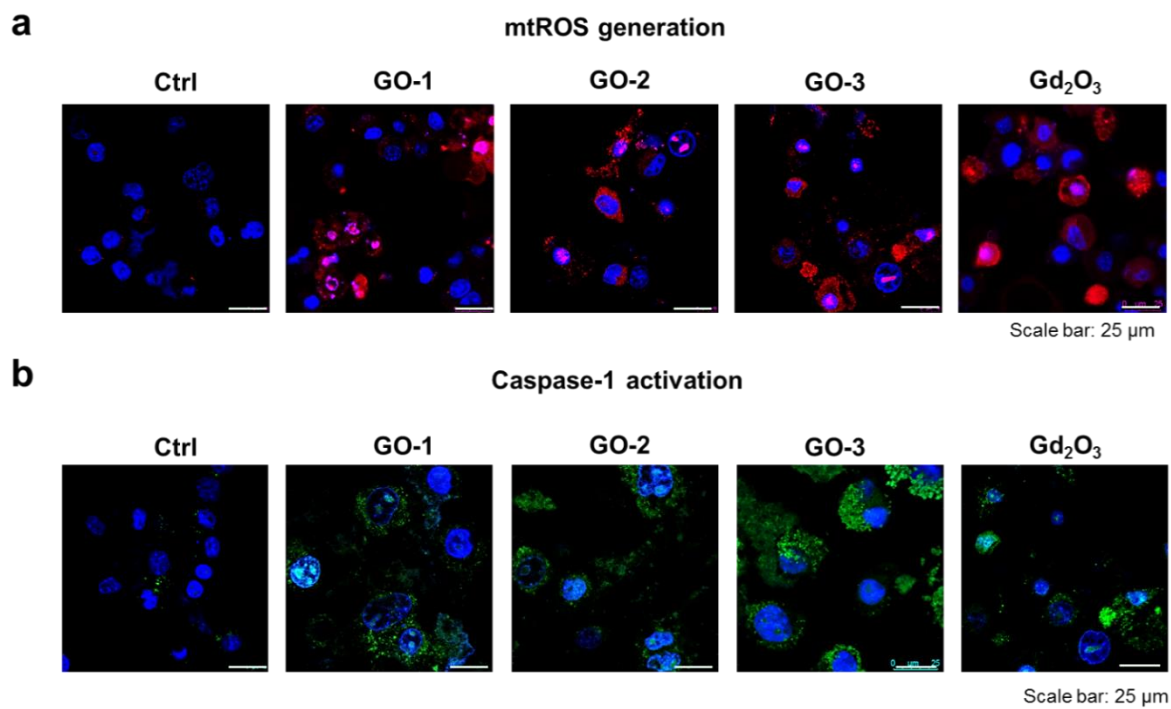

335

336 **Fig. S19.** Determination of the mtROS generation and caspase-1 activation in KUP5 cells  
337 treated with GO-1, GO-2, and GO-3. (a) MtROS generation was assessed by confocal  
338 microscopy. KUP5 cells exposed to 12.5 μg/mL of GOs or Gd<sub>2</sub>O<sub>3</sub> (positive control) for 16 h  
339 were stained with 5 μM of red MitoSOX and Hoechst 33342 for 15 min, respectively. (b)  
340 Assessment of caspase-1 activation in GO-treated KUP5 cells. The LPS-primed KUP5 cells  
341 were washed with PBS, stained with FAM-FLICA caspase substrate (green) for 1 h and  
342 Hoechst 33342 for 15 min, and imaged using Leica Confocal SP8-SMD microscope. The scale  
343 bar is 25 μm.

344

345

346

347

348

349

350

351

352

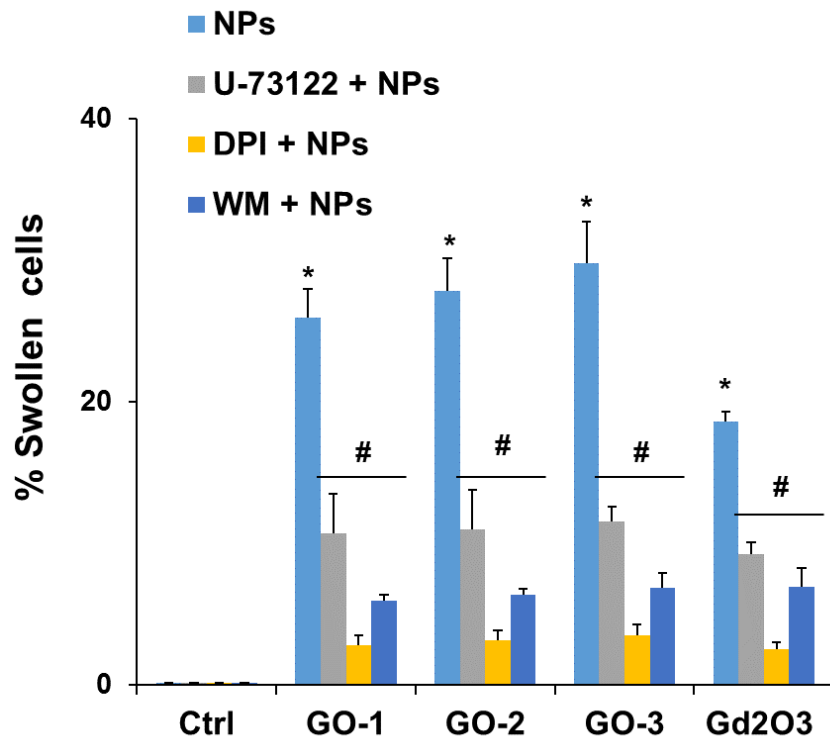

353

354 **Fig. S20.** Effect of various inhibitors on cells swelling by GO-1, GO-2, and GO-3. The  
355 percentage of swollen cells was calculated based on the cells expressing at least two giant blebs  
356 in KUP5 cells pretreated with various inhibitors, including U-73122 used as a PLC inhibitor,  
357 DPI used as an NADPH oxidase inhibitor, and WM used as an inhibitor on cellular uptake of  
358 GO. \*,  $P < 0.05$ , indicates significance compared with the control; #,  $P < 0.05$ , indicates  
359 significance between GO treatments without and with inhibitors.

360

361

362

363

364

365

366

367

368

369

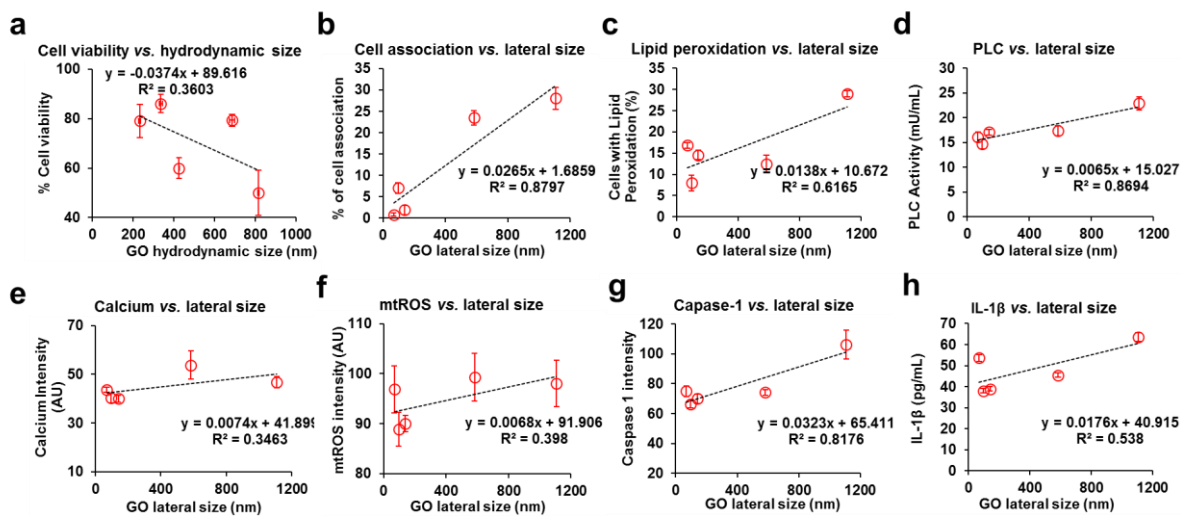

370

371 **Fig. S21.** The correlation plots of the GO in KUP5 cells. (a) The plotting of the GO  
372 hydrodynamic size showed correlation coefficients with cell viability. (b-h) Plotting of the GO  
373 lateral size (AFM) showed excellent correlation coefficients with cell association (b), lipid  
374 peroxidation (c), PLC activation (d), calcium flux (e), mtROS generation (f), caspase-1  
375 activation (g), as well as IL-1 $\beta$  release (h).

376

377

378

379

380

381

382

383

384

385

386

387

388



389

390

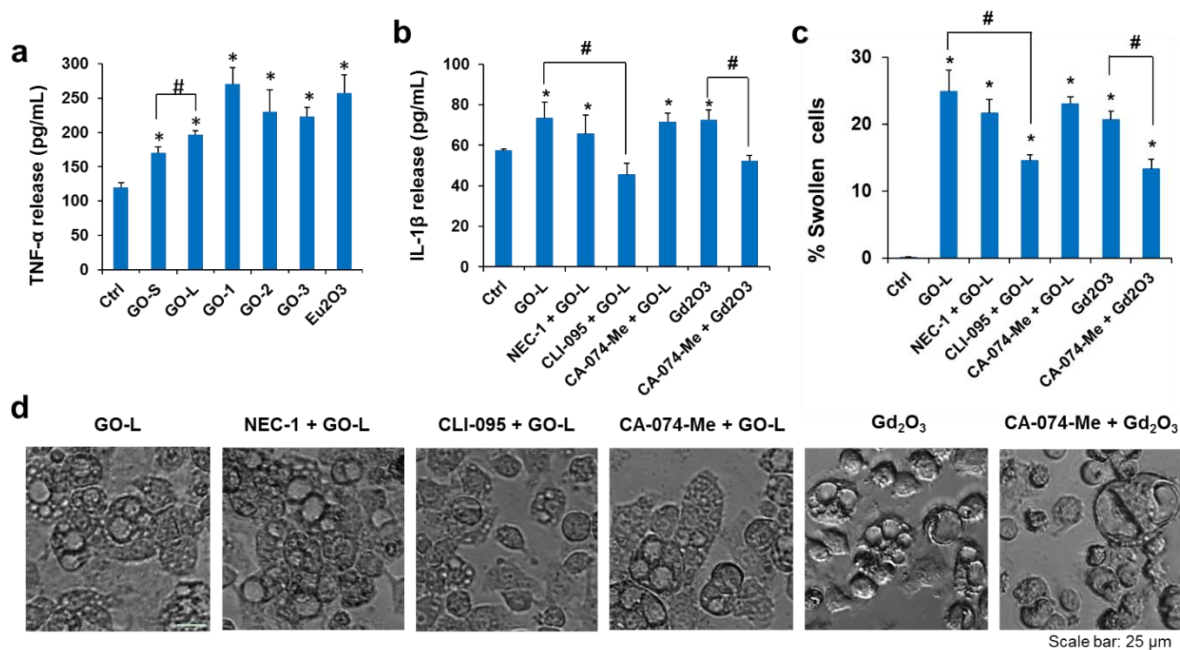

391

392 **Fig. S22.** TNF- $\alpha$  production, IL-1 $\beta$  release, and cell swelling in GO-treated KUP5. LPS-primed

393 (1  $\mu$ g/mL, 4 h) KUP5 cells were pretreated with 30 nM of necroptosis inhibitor NEC-1

394 (necrostatin-1) overnight, 1  $\mu$ g/mL of CLI-095 (TLR4 inhibitor) overnight, and 30  $\mu$ M of the

395 cathepsin B inhibitor CA-074-Me for 6 h, respectively, before GO exposure. Supernatants were

396 collected to measure TNF- $\alpha$  (a) and IL-1 $\beta$  (b) release by ELISA, respectively. The percentage

397 of swollen cells (c) was calculated based on the cells expressing at least two giant blebs in

398 KUP5 cells (d) pretreated with various inhibitors. The scale bar is 20  $\mu$ m. \*,  $P < 0.05$ , indicates

399 significance compared with the control; #,  $P < 0.05$ , indicates significance between GO

400 treatments

401

402

403

404

405

406

407

408 **Table**

409

410 **Tab S1.** Hydrodynamic size, polydispersity index, and zeta potential of GO in different media.

411

| <b>Media</b>                 | <b>Sample</b> | <b>Hydrodynamic size (nm)</b> | <b>Polydispersity index (PDI)</b> | <b>Z-potential (mV)</b> |
|------------------------------|---------------|-------------------------------|-----------------------------------|-------------------------|
| <b>DI H2O</b>                | GO-1          | 148.0 ± 1.1                   | 0.2                               | -40.7 ± 2.0             |
|                              | GO-2          | 260.3 ± 0.6                   | 0.3                               | -59.86 ± 1.3            |
|                              | GO-3          | 417.8 ± 14.3                  | 0.3                               | -51.57 ± 2.4            |
| <b>DMEM (KUP5)</b>           | GO-1          | 233.8 ± 4.2                   | 0.2                               | -7.5 ± 1.8              |
|                              | GO-2          | 426.4 ± 0.5                   | 0.3                               | -10.2 ± 0.6             |
|                              | GO-3          | 815.5 ± 2.8                   | 0.3                               | -11.4 ± 1.9             |
| <b>Prigrow medium (LSEC)</b> | GO-1          | 172.6 ± 5.2                   | 0.2                               | -11.1 ± 1.7             |
|                              | GO-2          | 327.1 ± 4.1                   | 0.3                               | -11.4 ± 3.6             |
|                              | GO-3          | 529.4 ± 14.2                  | 0.3                               | -12.3 ± 2.4             |
| <b>DMEM (Hepa 1-6)</b>       | GO-1          | 217.6 ± 1.9                   | 0.2                               | -10.9 ± 1.9             |
|                              | GO-2          | 345.3 ± 15.1                  | 0.3                               | -9.7 ± 2.5              |
|                              | GO-3          | 816.8 ± 29.3                  | 0.3                               | -7.5 ± 0.6              |

412
